# Supplementary material for: A deep-ultraviolet nonlinear-optical material with a wide bandgap and large static dielectric polarizability coefficient: Na6Si3F18
Source: Royal Society of Chemistry journal article supplement (doi:10.1039/d4ma00973h), 2024-01-01
Supplement: d4ma00973h1.pdf [file d4ma00973h1.pdf]

A Deep-Ultraviolet Nonlinear-Optical Material with Wide Band Gap and Large Static Dielectric Polarizability Coefficient:  $\text{Na}_6\text{Si}_3\text{F}_{18}$

Changcheng Tang\*<sup>1,2</sup>, Xingxing Jiang<sup>3,4</sup>, Xiuyu Wu<sup>1,2</sup>, Yuechen Gong<sup>1,2</sup>, Chao Yang<sup>1,2</sup>, Ruixin Guo<sup>5,6</sup>, Panpan Wang<sup>1,2</sup>, Yongming Huang<sup>1,2</sup>, Dakun Zhou<sup>1,2</sup>, Huaiming Chen<sup>1,2</sup>, Zheshuai Lin<sup>3,4</sup>

# Content

## 1. Tables

**Table S1.** Crystallographic record and structural refinement information

**Table S2.** Fractional atomic coordinates and isotropic or equivalent isotropic displacement parameters ( $\text{\AA}^2$ )

**Table S3.** Atomic displacement parameters ( $\text{\AA}^2 \times 10^2$ )

**Table S4.** Selected geometric information ( $\text{\AA}$ ,  $^\circ$ )

**Table S5.** Torsion angles for  $\text{Na}_6\text{Si}_3\text{F}_{18}$

**Table S6.** The calculated refractive indices  $n$  and the birefringence  $\Delta n$  of  $\text{Na}_6\text{Si}_3\text{F}_{18}$  crystal

**Table S7.** The calculated dielectric polarizabilities matrix of  $\text{Na}_6\text{Si}_3\text{F}_{18}$  crystal compared with  $\alpha\text{-SiO}_2$  and  $Pmn2_1$  phase  $\text{SrB}_4\text{O}_7$

**Table S8.** The SHG tensors of  $\text{Na}_6\text{Si}_3\text{F}_{18}$  compared with  $\text{SiO}_2$  and  $\text{SrB}_4\text{O}_7$ .

## 2. Figures

**Figure S1.** As-grown crystals of  $\text{Na}_6\text{Si}_3\text{F}_{18}$  and compared raw material XRD.

**Figure S2.** Calculated (blue) and experimental (red) powder XRD patterns of  $\text{Na}_6\text{Si}_3\text{F}_{18}$

**Figure S3.** The  $[\text{Si}_1\text{Na}_9\text{F}_{42}]$  group viewed down  $[0\ 0\ 1]$ .

**Figure S4.** The  $[\text{Si}_2\text{Na}_9\text{F}_{42}]$  group viewed down  $[0\ 0\ 1]$ .

**Figure S5.** The UV-vis-NIR transmittance spectra of  $\text{Na}_6\text{Si}_3\text{F}_{18}$ .

**Figure S6.** The Na and Si compared partial density of state with spin polarized projected on the constituent elements of  $\text{Na}_6\text{Si}_3\text{F}_{18}$ .

**Figure S7.** The SHG testing picture of  $\text{Na}_6\text{Si}_3\text{F}_{18}$  crystal.

## 1. Tables

**Table S1.** Crystallographic record and structural refinement information

| Empirical formula                      | Na <sub>6</sub> Si <sub>3</sub> F <sub>18</sub> |
|----------------------------------------|-------------------------------------------------|
| Formula weight(g/mol)                  | 564.17                                          |
| Temperature(K)                         | 150(2)                                          |
| Wavelength (Å)                         | 0.71073                                         |
| Crystal system                         | <i>Trigonal</i>                                 |
| Space group                            | <i>P321</i>                                     |
| <i>a</i> (Å)                           | 8.8384(2)                                       |
| <i>b</i> (Å)                           | 8.8384(2)                                       |
| <i>c</i> (Å)                           | 5.0117(2)                                       |
| $\alpha$ (°)                           | 90                                              |
| $\beta$ (°)                            | 90                                              |
| $\gamma$ (°)                           | 120                                             |
| Volume(Å <sup>3</sup> )                | 339.05(2)                                       |
| <i>Z</i>                               | 3                                               |
| Density (g cm <sup>-3</sup> )          | 2.763                                           |
| $\mu$ (mm <sup>-1</sup> )              | 0.753                                           |
| <i>F</i> (000)                         | 270                                             |
| R1,wR2 [I>2 $\sigma$ (I)] <sup>a</sup> | 0.0213, 0.0489                                  |
| R1,wR2[all data] <sup>a</sup>          | 0.0213, 0.0489                                  |

$$^a R_1 = \sum | | F_o | - | F_c | | / \sum | F_o | ; wR_2 = \{ (\sum [w(F_o^2 - F_c^2)^2]) / \sum wF_o^4 \}^{1/2}$$

**Table S2.** Fractional atomic coordinates and isotropic or equivalent isotropic

| <b>Atom</b> | <b>Wyck.</b> | <b><i>x/a</i></b> | <b><i>y/b</i></b> | <b><i>z/c</i></b> | <b><i>U</i><sub>eq</sub></b> | <b><i>BVS</i></b> |
|-------------|--------------|-------------------|-------------------|-------------------|------------------------------|-------------------|
| Si1         | 2d           | 1/3               | 2/3               | 0.9943(2)         | 0.0094(2)                    | 4.48              |
| Si2         | 6g           | 0                 | 1                 | 1/2               | 0.0082(3)                    | 4.60              |
| Na1         | 3e           | 0                 | 0.71224(13)       | 1                 | 0.0131(3)                    | 1.24              |
| Na2         | 3f           | 0                 | 0.37756(15)       | 1/2               | 0.0135(3)                    | 0.99              |
| F1          | 6g           | 0.15483(15)       | 0.5972(2)         | 0.7993(3)         | 0.0139(3)                    | 1.12              |
| F2          | 6g           | 0.2606(2)         | 0.7731(2)         | 1.1882(4)         | 0.0149(3)                    | 1.10              |
| F3          | 6g           | 0.0949(3)         | 0.9151(3)         | 0.6913(3)         | 0.0181(3)                    | 1.15              |

**Table S3.** Atomic displacement parameters ( $\text{\AA}^2$ ) for  $\text{Na}_6\text{Si}_3\text{F}_{18}$ . The anisotropic displacement factor exponent takes the form:  $-2\pi^2[ h^2(a^*)^2U_{11} + k^2(b^*)^2U_{22} + \dots + 2hka^*b^*U_{12} ]$

| Atom | $U_{11}$  | $U_{22}$  | $U_{33}$  | $U_{23}$   | $U_{13}$   | $U_{12}$    |
|------|-----------|-----------|-----------|------------|------------|-------------|
| Si1  | 0.0092(3) | 0.0092(3) | 0.0098(5) | 0.000      | 0.000      | 0.00458(15) |
| Si2  | 0.0073(4) | 0.0073(4) | 0.0101(7) | 0.000      | 0.000      | 0.00365(18) |
| Na1  | 0.0151(6) | 0.0125(4) | 0.0127(7) | 0.0025(5)  | 0.0049(9)  | 0.0075(3)   |
| Na2  | 0.0176(7) | 0.0137(4) | 0.0106(6) | -0.0005(5) | -0.0010(9) | 0.0088(3)   |
| F1   | 0.0090(6) | 0.0162(7) | 0.0167(6) | -0.0050(7) | -0.0027(6) | 0.0064(6)   |
| F2   | 0.0152(8) | 0.0152(8) | 0.0166(6) | -0.0053(8) | -0.0029(8) | 0.0093(6)   |
| F3   | 0.0181(8) | 0.0208(7) | 0.0182(7) | 0.0091(10) | 0.0014(10) | 0.0119(6)   |

**Table S4.** Selected geometric information (Å, °), Bond lengths and angles for Na<sub>6</sub>Si<sub>3</sub>F<sub>18</sub>

|                      |            |           |            |           |            |
|----------------------|------------|-----------|------------|-----------|------------|
| Si1–F2               | 1.6877(17) | F2–Si1–F1 | 90.61(8)   | F3–Na1–F2 | 99.77(8)   |
| Si1–F2 <sup>#1</sup> | 1.6877(17) | F2–Si1–F1 | 89.36(8)   | F3–Na1–F2 | 99.55(8)   |
| Si1–F2 <sup>#2</sup> | 1.6877(17) | F1–Si1–F1 | 89.88(7)   | F2–Na1–F2 | 148.93(10) |
| Si1–F1 <sup>#1</sup> | 1.6888(13) | F2–Si1–F1 | 179.10(9)  | F3–Na1–F1 | 89.09(6)   |
| Si1–F1 <sup>#2</sup> | 1.6888(13) | F2–Si1–F1 | 90.61(8)   | F2–Na1–F1 | 94.04(7)   |
| Si1–F1               | 1.6888(13) | F1–Si1–F1 | 89.88(7)   | F2–Na1–F1 | 62.23(5)   |
| Si2–F3               | 1.6780(14) | F3–Si2–F3 | 91.60(14)  | F1–Na1–F1 | 84.82(9)   |
| Si2–F3 <sup>#4</sup> | 1.6780(14) | F3–Si2–F3 | 90.59(8)   | F1–Na2–F1 | 113.37(9)  |
| Si2–F3 <sup>#5</sup> | 1.6780(14) | F3–Si2–F3 | 176.96(15) | F1–Na2–F2 | 87.35(5)   |
| Si2–F3 <sup>#6</sup> | 1.6780(14) | F3–Si2–F3 | 90.60(8)   | F1–Na2–F2 | 93.50(5)   |
| Si2–F3 <sup>#7</sup> | 1.6780(14) | F3–Si2–F3 | 87.29(13)  | F3–Na1–F1 | 160.18(6)  |
| Si2–F3 <sup>#8</sup> | 1.6780(14) | F3–Si2–F3 | 87.29(13)  | F2–Na2–F2 | 178.46(10) |
| F1–Na2               | 2.2879(14) | F3–Si2–F3 | 91.60(14)  | F1–Na2–F3 | 151.80(6)  |
| F1–Na1               | 2.3045(17) | F3–Si2–F3 | 87.29(13)  | F1–Na2–F3 | 94.76(5)   |
| F2–Na1               | 2.2900(16) | F3–Si2–F3 | 176.96(15) | F2–Na2–F3 | 93.08(8)   |
| F2–Na2 <sup>#3</sup> | 2.3363(17) | F3–Na1–F3 | 102.43(9)  | F2–Na2–F3 | 85.57(7)   |
| F2–Si1–F2            | 90.16(9)   | F3–Na1–F2 | 99.54(8)   | F3–Na2–F3 | 57.23(8)   |

Symmetry transformations used to generate equivalent atoms:

#1: -X+Y, 1-X, +Z; #2: 1-Y, 1+X-Y, +Z; #3: -X+Y, 1-X, 1+Z; #4: -X, -X+Y, 1-Z;  
#5: 1-Y, 2+X-Y, +Z; #6: -1+Y, 1+X, 1-Z; #7: -1-X+Y, 1-X, +Z; #8: 1+X-Y, 2-Y, 1-Z;  
#9: -Y, 1+X-Y, +Z; #10: +X, 1+Y, +Z; #11: -X, -X+Y, 2-Z; #12: -1+Y, +X, 2-Z;  
#13: +X, +Y, 1+Z; #14: 1-Y, 1+X-Y, -1+Z; #15: -1+Y, +X, 1-Z; #16: +X, -1+Y, +Z;  
#17: +X, +Y, -1+Z; #18: -1-X+Y, -X, -1+Z; #19: -1-X+Y, -X, +Z;

**Table S5.** Torsion angles for Na<sub>6</sub>Si<sub>3</sub>F<sub>18</sub>

|                                            |             |                                             |             |
|--------------------------------------------|-------------|---------------------------------------------|-------------|
| F2–Si1–F1–Na2                              | –158.92(12) | F2 <sup>#1</sup> –Si1–F2–Na2 <sup>#3</sup>  | 108.78(7)   |
| F2 <sup>#1</sup> –Si1–F1–Na2               | –68.77(13)  | F1 <sup>#2</sup> –Si1–F2–Na2 <sup>#3</sup>  | –70.75(15)  |
| F1 <sup>#2</sup> –Si1–F1–Na2               | 110.47(6)   | F1–Si1–F2–Na2 <sup>#3</sup>                 | –160.62(14) |
| F1 <sup>#1</sup> –Si1–F1–Na2               | 20.59(13)   | Na1–Si1–F2–Na2 <sup>#3</sup>                | –161.7(2)   |
| Na1–Si1–F1–Na2                             | –157.88(16) | Na1 <sup>#2</sup> –Si1–F2–Na2 <sup>#3</sup> | –25.81(14)  |
| Na1 <sup>#2</sup> –Si1–F1–Na2              | 111.99(11)  | Na1 <sup>#1</sup> –Si1–F2–Na2 <sup>#3</sup> | 108.50(13)  |
| Na1 <sup>#1</sup> –Si1–F1–Na2              | –24.34(11)  | F3 <sup>#4</sup> –Si2–F3–Na1                | –74.10(15)  |
| F2–Si1–F1–Na1                              | –1.04(9)    | F3 <sup>#5</sup> –Si2–F3–Na1                | 103.81(7)   |
| F2 <sup>#1</sup> –Si1–F1–Na1               | 89.12(8)    | F3 <sup>#6</sup> –Si2–F3–Na1                | 13.20(14)   |
| F1 <sup>#2</sup> –Si1–F1–Na1               | –91.64(11)  | F3 <sup>#7</sup> –Si2–F3–Na1                | –164.6(2)   |
| F1 <sup>#1</sup> –Si1–F1–Na1               | 178.48(9)   | Na2 <sup>#8</sup> –Si2–F3–Na1               | –30.44(13)  |
| Na1 <sup>#2</sup> –Si1–F1–Na1              | –90.13(7)   | Na2 <sup>#2</sup> –Si2–F3–Na1               | –164.6(2)   |
| Na1 <sup>#1</sup> –Si1–F1–Na1              | 133.55(6)   | Na2 <sup>#9</sup> –Si2–F3–Na1               | 105.90(15)  |
| F2 <sup>#2</sup> –Si1–F2–Na1               | –179.72(9)  | F3 <sup>#4</sup> –Si2–F3–Na2 <sup>#2</sup>  | 90.52(8)    |
| F2 <sup>#1</sup> –Si1–F2–Na1               | –89.56(13)  | F3 <sup>#5</sup> –Si2–F3–Na2 <sup>#2</sup>  | –91.58(15)  |
| F1 <sup>#2</sup> –Si1–F2–Na1               | 90.92(8)    | F3 <sup>#6</sup> –Si2–F3–Na2 <sup>#2</sup>  | 177.82(11)  |
| F1–Si1–F2–Na1                              | 1.05(9)     | F3 <sup>#7</sup> –Si2–F3–Na2 <sup>#2</sup>  | –0.001(0)   |
| Na1 <sup>#2</sup> –Si1–F2–Na1              | 135.86(7)   | Na2 <sup>#8</sup> –Si2–F3–Na2 <sup>#2</sup> | 134.18(7)   |
| Na1 <sup>#1</sup> –Si1–F2–Na1              | –89.83(9)   | Na2 <sup>#9</sup> –Si2–F3–Na2 <sup>#2</sup> | –89.48(8)   |
| F2 <sup>#2</sup> –Si1–F2–Na2 <sup>#3</sup> | 18.62(16)   |                                             |             |

Symmetry transformations used to generate equivalent atoms:

#1: 1–Y, 1+X–Y, +Z;    #2: –X+Y, 1–X, +Z;    #3: –X+Y, 1–X, 1+Z;    #4: –X, –X+Y, 1–Z;  
#5: 1–Y, 2+X–Y, +Z;    #6: –1–X+Y, 1–X, +Z;    #7: 1+X–Y, 2–Y, 1–Z;    #8: –Y, 1+X–Y, +Z;  
#9: +X, 1+Y, +Z;

**Table S6.** The calculated refractive indices  $n$  and the birefringence  $\Delta n$  of  $\text{Na}_6\text{Si}_3\text{F}_{18}$  crystal

| Wavelength(nm) | $n_{(100)}$ | $n_{(010)}$ | $n_{(001)}$ | $\Delta n$ |
|----------------|-------------|-------------|-------------|------------|
| 5533.64958     | 1.09341     | 1.09341     | 1.08951     | 0.0039     |
| 4773.57971     | 1.09342     | 1.09342     | 1.08951     | 0.00391    |
| 4197.07744     | 1.09342     | 1.09342     | 1.08952     | 0.0039     |
| 3744.81807     | 1.09343     | 1.09343     | 1.08953     | 0.0039     |
| 3380.54482     | 1.09344     | 1.09344     | 1.08953     | 0.00391    |
| 3080.85762     | 1.09345     | 1.09345     | 1.08954     | 0.00391    |
| 2829.98491     | 1.09346     | 1.09346     | 1.08955     | 0.00391    |
| 2433.63448     | 1.09348     | 1.09348     | 1.08958     | 0.0039     |
| 2011.13705     | 1.09352     | 1.09352     | 1.08962     | 0.0039     |
| 1559.81046     | 1.09361     | 1.09361     | 1.0897      | 0.00391    |
| 1076.60207     | 1.09384     | 1.09384     | 1.08993     | 0.00391    |
| 1044.25235     | 1.09387     | 1.09387     | 1.08996     | 0.00391    |
| 985.05533      | 1.09393     | 1.09393     | 1.09001     | 0.00392    |
| 907.85679      | 1.09403     | 1.09403     | 1.09011     | 0.00392    |
| 862.78017      | 1.0941      | 1.0941      | 1.09017     | 0.00393    |
| 821.96754      | 1.09417     | 1.09417     | 1.09024     | 0.00393    |
| 802.9757       | 1.09421     | 1.09421     | 1.09028     | 0.00393    |
| 784.84217      | 1.09424     | 1.09425     | 1.09032     | 0.00392    |
| 750.92506      | 1.09432     | 1.09432     | 1.09039     | 0.00393    |
| 705.2117       | 1.09445     | 1.09445     | 1.09052     | 0.00393    |
| 691.18601      | 1.09449     | 1.09449     | 1.09056     | 0.00393    |
| 652.26821      | 1.09463     | 1.09463     | 1.09069     | 0.00394    |
| 606.71873      | 1.09483     | 1.09483     | 1.09088     | 0.00395    |
| 558.01         | 1.0951      | 1.0951      | 1.09114     | 0.00396    |
| 532.36636      | 1.09527     | 1.09527     | 1.09131     | 0.00396    |
| 501.62943      | 1.09551     | 1.09551     | 1.09155     | 0.00396    |
| 455.59658      | 1.09597     | 1.09598     | 1.092       | 0.00397    |
| 407.51536      | 1.09665     | 1.09665     | 1.09265     | 0.004      |
| 357.2464       | 1.09768     | 1.09768     | 1.09366     | 0.00402    |
| 304.10351      | 1.09944     | 1.09944     | 1.09537     | 0.00407    |
| 266.75588      | 1.10144     | 1.10144     | 1.09732     | 0.00412    |
| 212.8428       | 1.10686     | 1.10687     | 1.10261     | 0.00425    |
| 192.77224      | 1.11051     | 1.11051     | 1.10617     | 0.00434    |
| 177.05822      | 1.11463     | 1.11463     | 1.1102      | 0.00443    |
| 161.43158      | 1.12064     | 1.12064     | 1.1161      | 0.00454    |
| 148.97546      | 1.12787     | 1.12787     | 1.12321     | 0.00466    |
| 140.54108      | 1.13498     | 1.13498     | 1.13024     | 0.00474    |
| 133.01056      | 1.14411     | 1.14411     | 1.13931     | 0.0048     |
| 124.88501      | 1.1602      | 1.1602      | 1.1555      | 0.0047     |
| 120.13621      | 1.17571     | 1.17571     | 1.17144     | 0.00427    |
| 118.09502      | 1.18425     | 1.18425     | 1.18027     | 0.00398    |



**Table S7.** The calculated dielectric polarizabilities matrix of  $\text{Na}_6\text{Si}_3\text{F}_{18}$  crystal compared with  $\alpha\text{-SiO}_2$  and  $Pmn2_1$  phase  $\text{SrB}_4\text{O}_7$

| crystal                               | phase    | Optical (f->infinity)                                                                    | Static (f=0)                                                                                |
|---------------------------------------|----------|------------------------------------------------------------------------------------------|---------------------------------------------------------------------------------------------|
| $\text{SiO}_2$                        | $P3_121$ | $\begin{bmatrix} 13.56004 & 0 & 0 \\ 0 & 13.56004 & 0 \\ 0 & 0 & 13.79581 \end{bmatrix}$ | $\begin{bmatrix} 33.76732 & 0 & 0 \\ 0 & 33.76732 & 0 \\ 0 & 0 & 35.34961 \end{bmatrix}$    |
| $\text{Na}_6\text{Si}_3\text{F}_{18}$ | $P321$   | $\begin{bmatrix} 21.55810 & 0 & 0 \\ 0 & 21.55810 & 0 \\ 0 & 0 & 21.17250 \end{bmatrix}$ | $\begin{bmatrix} 100.00777 & 0 & 0 \\ 0 & 100.00777 & 0 \\ 0 & 0 & 152.20484 \end{bmatrix}$ |
| $\text{SrB}_4\text{O}_7$              | $Pmn2_1$ | $\begin{bmatrix} 34.77742 & 0 & 0 \\ 0 & 34.49517 & 0 \\ 0 & 0 & 34.66299 \end{bmatrix}$ | $\begin{bmatrix} 130.732770 & 0 & 0 \\ 0 & 155.57194 & 0 \\ 0 & 0 & 144.6656 \end{bmatrix}$ |

**Table S8.** The SHG tensors of  $\text{Na}_6\text{Si}_3\text{F}_{18}$  compared with  $\text{SiO}_2$  and  $\text{SrB}_4\text{O}_7$ .

| crystal                               | phase    | SHG tensors (pm/v)            |                                |                 |
|---------------------------------------|----------|-------------------------------|--------------------------------|-----------------|
| $\text{SiO}_2$                        | $P3_121$ | $d_{112}=-0.50$               | $d_{222}=0.50$                 |                 |
| $\text{Na}_6\text{Si}_3\text{F}_{18}$ | $P321$   | $d_{112}=0.78 \times 10^{-3}$ | $d_{222}=-0.78 \times 10^{-3}$ |                 |
| $\text{SrB}_4\text{O}_7$              | $Pmn2_1$ | $d_{113}=1.17$                | $d_{223}=0.67$                 | $d_{333}=-1.97$ |

## 2. Figures

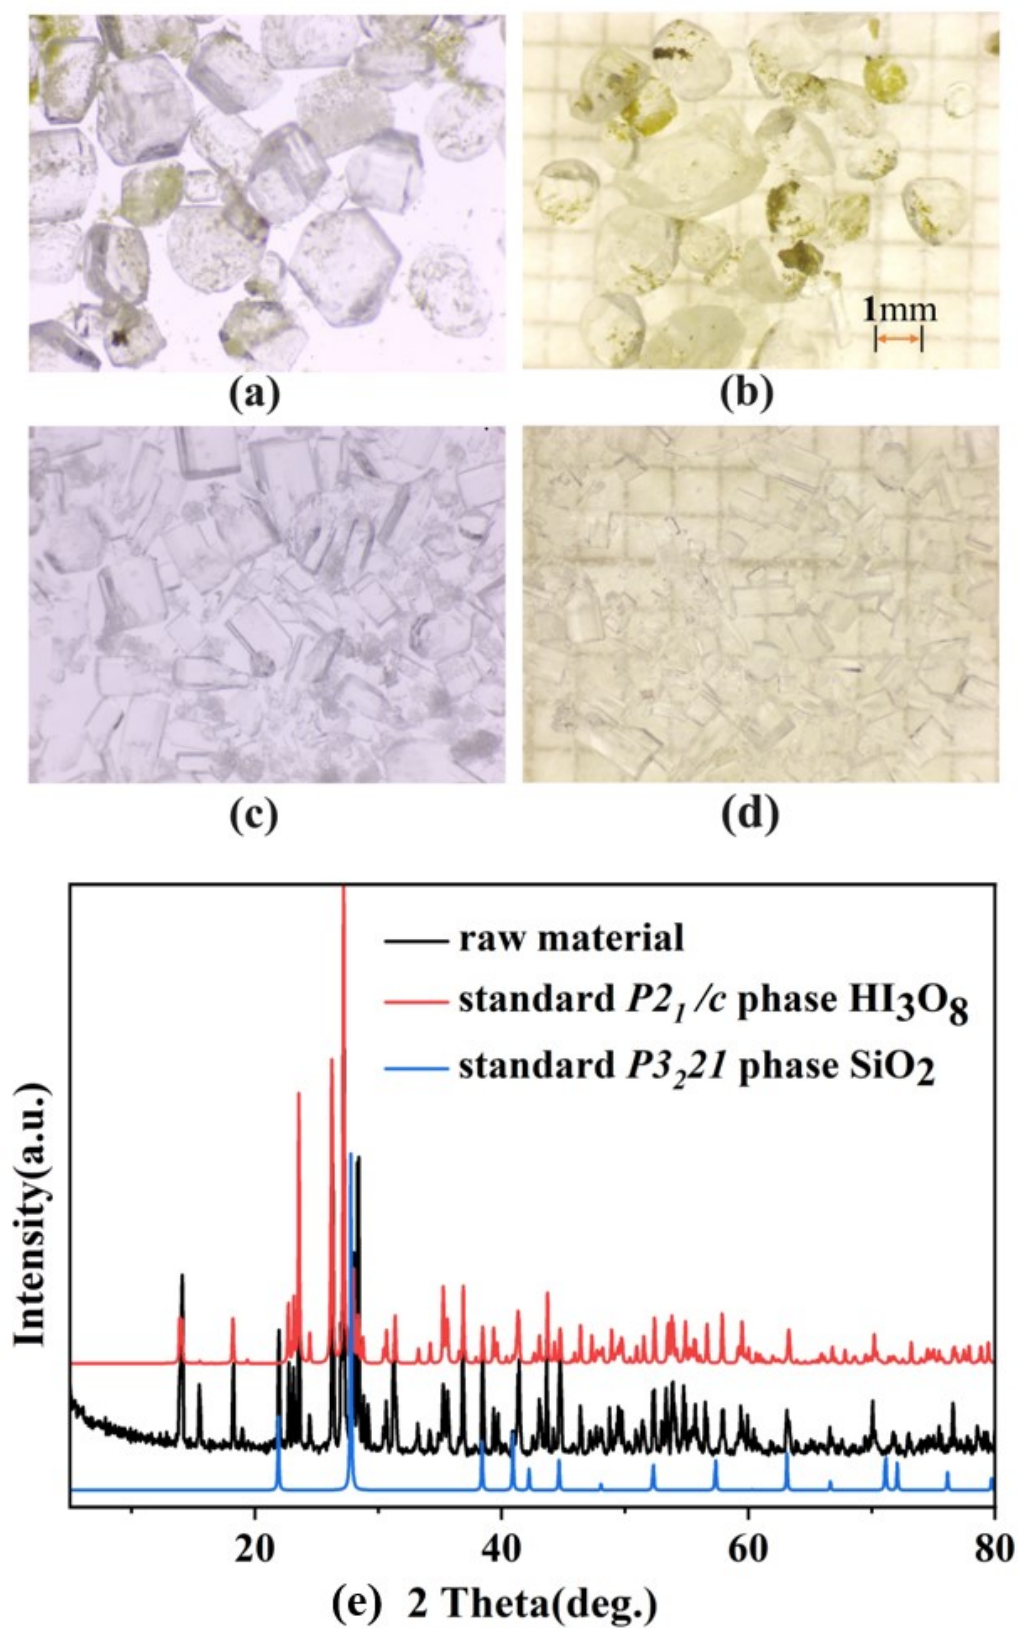

**Figure S1.** As-grown crystals of  $\text{Na}_6\text{Si}_3\text{F}_{18}$  and compared raw material XRD. (a) and (b) Impurity crystallization sample; (c) and (d) Sel-crystallization sample; (e) the compared XRD of raw material ( $\text{HIO}_3$ ) with  $P2_1/c$  phase  $\text{HI}_3\text{O}_8$  and  $P3_221$  phase  $\text{SiO}_2$ .

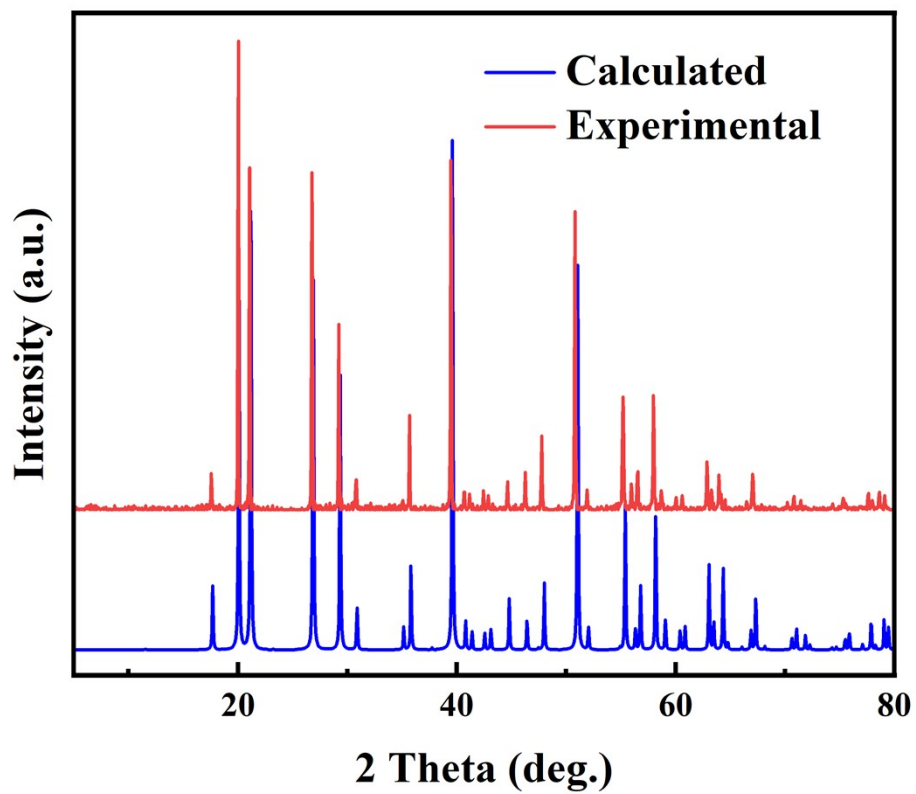

**Figure S2.** Calculated(blue) and experimental(red) powder XRD patterns of Na<sub>6</sub>Si<sub>3</sub>F<sub>18</sub> .

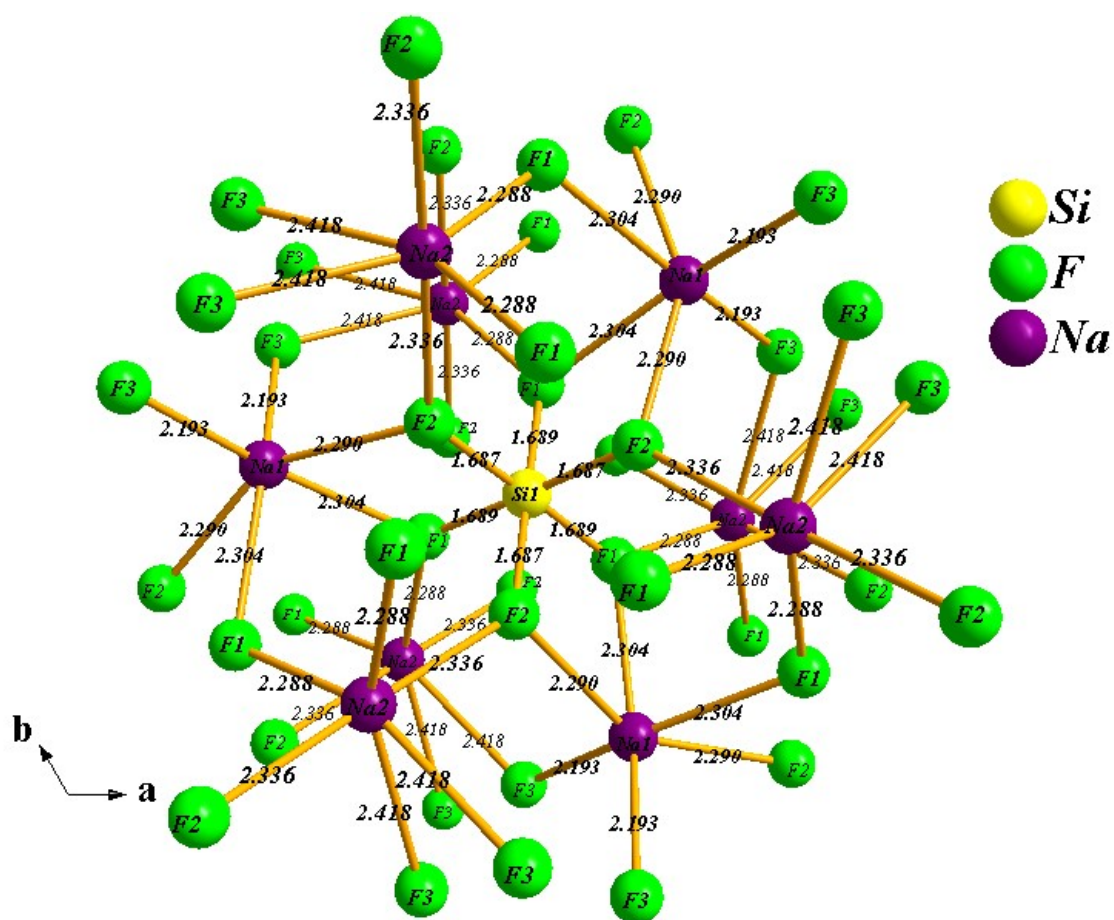

Figure S3. The  $[\text{Si}_1\text{Na}_9\text{F}_{42}]$  group viewed down  $[0\ 0\ 1]$ .

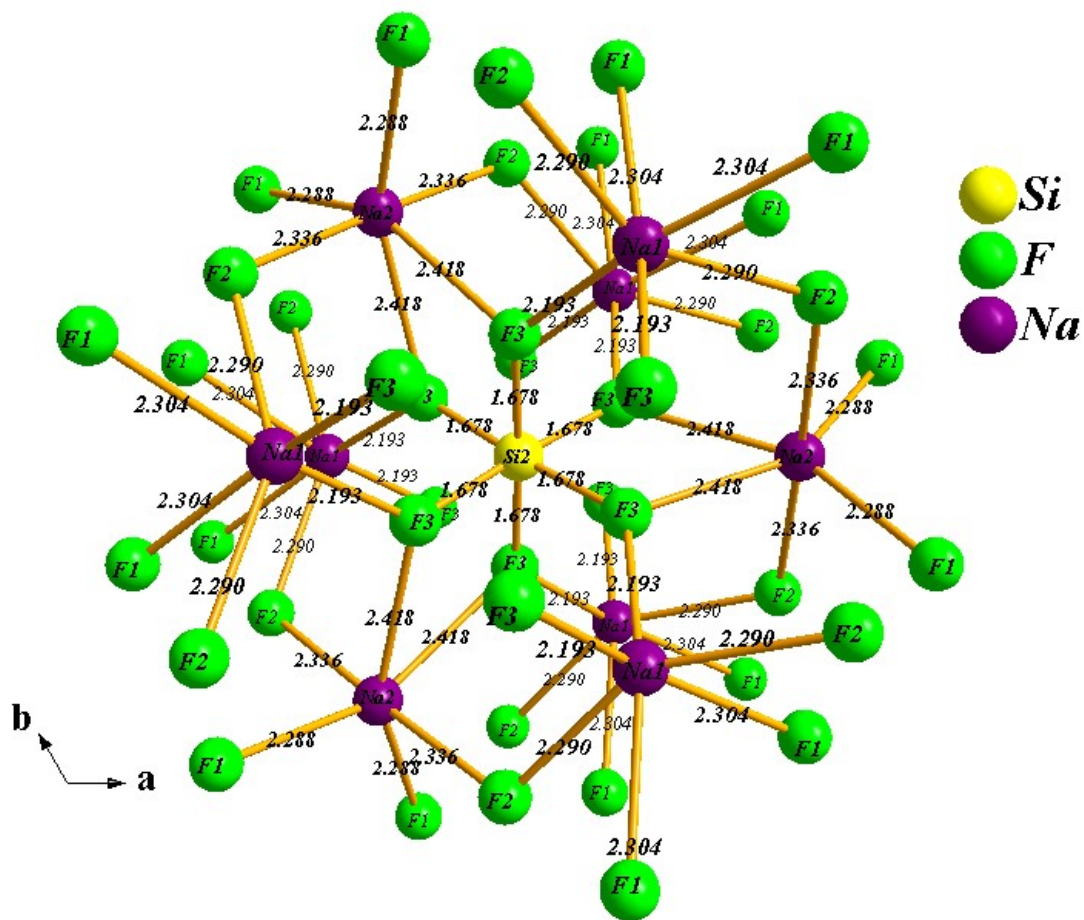

Figure S4. The  $[\text{Si}_2\text{Na}_9\text{F}_{42}]$  group viewed down  $[0\ 0\ 1]$ .

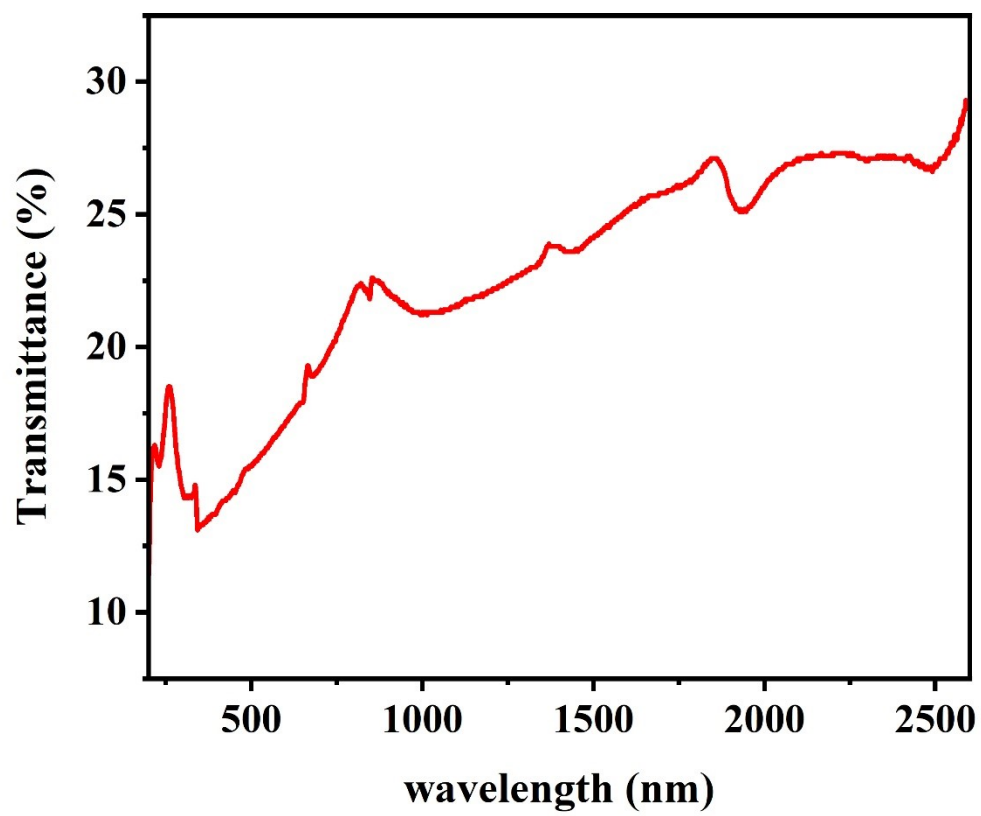

**Figure S5.** The UV-vis-NIR transmittance spectra of Na<sub>6</sub>Si<sub>3</sub>F<sub>18</sub>.

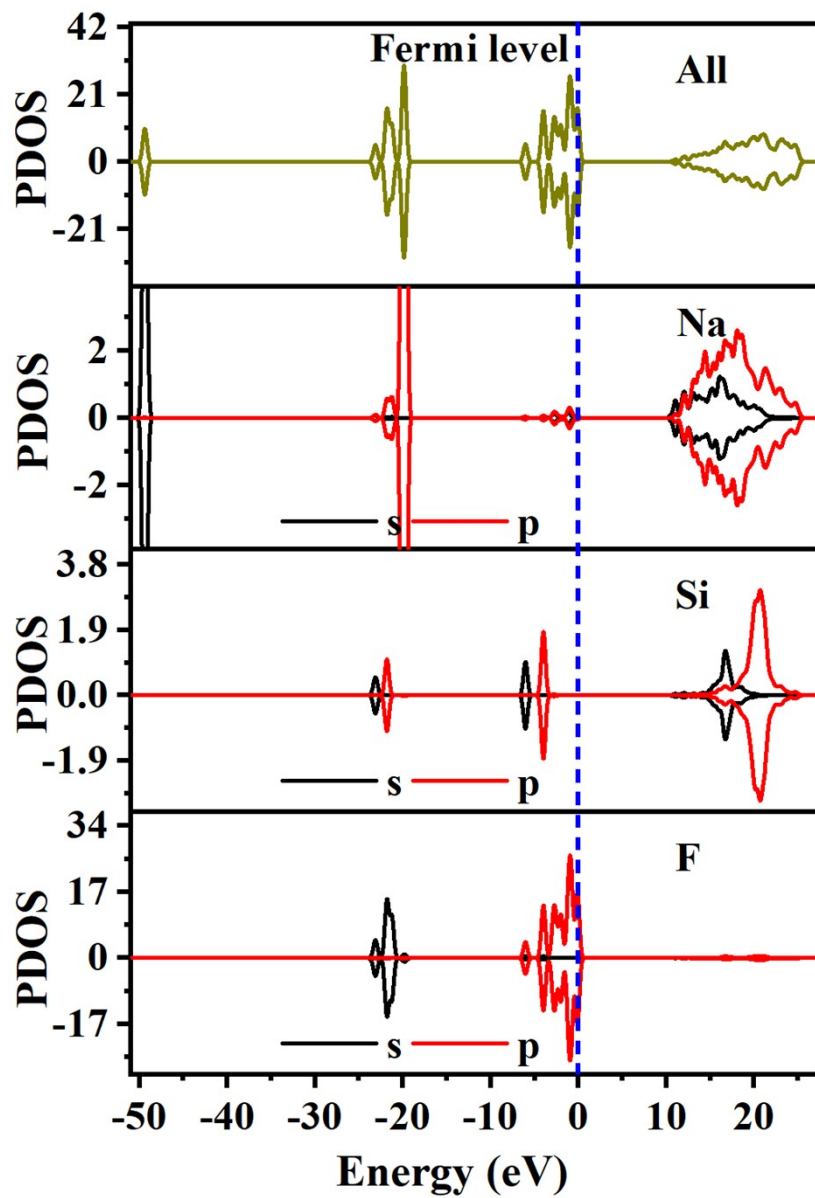

**Figure S6.** The Na and Si compared partial density of state with spin polarized projected on the constituent elements of  $\text{Na}_6\text{Si}_3\text{F}_{18}$ .



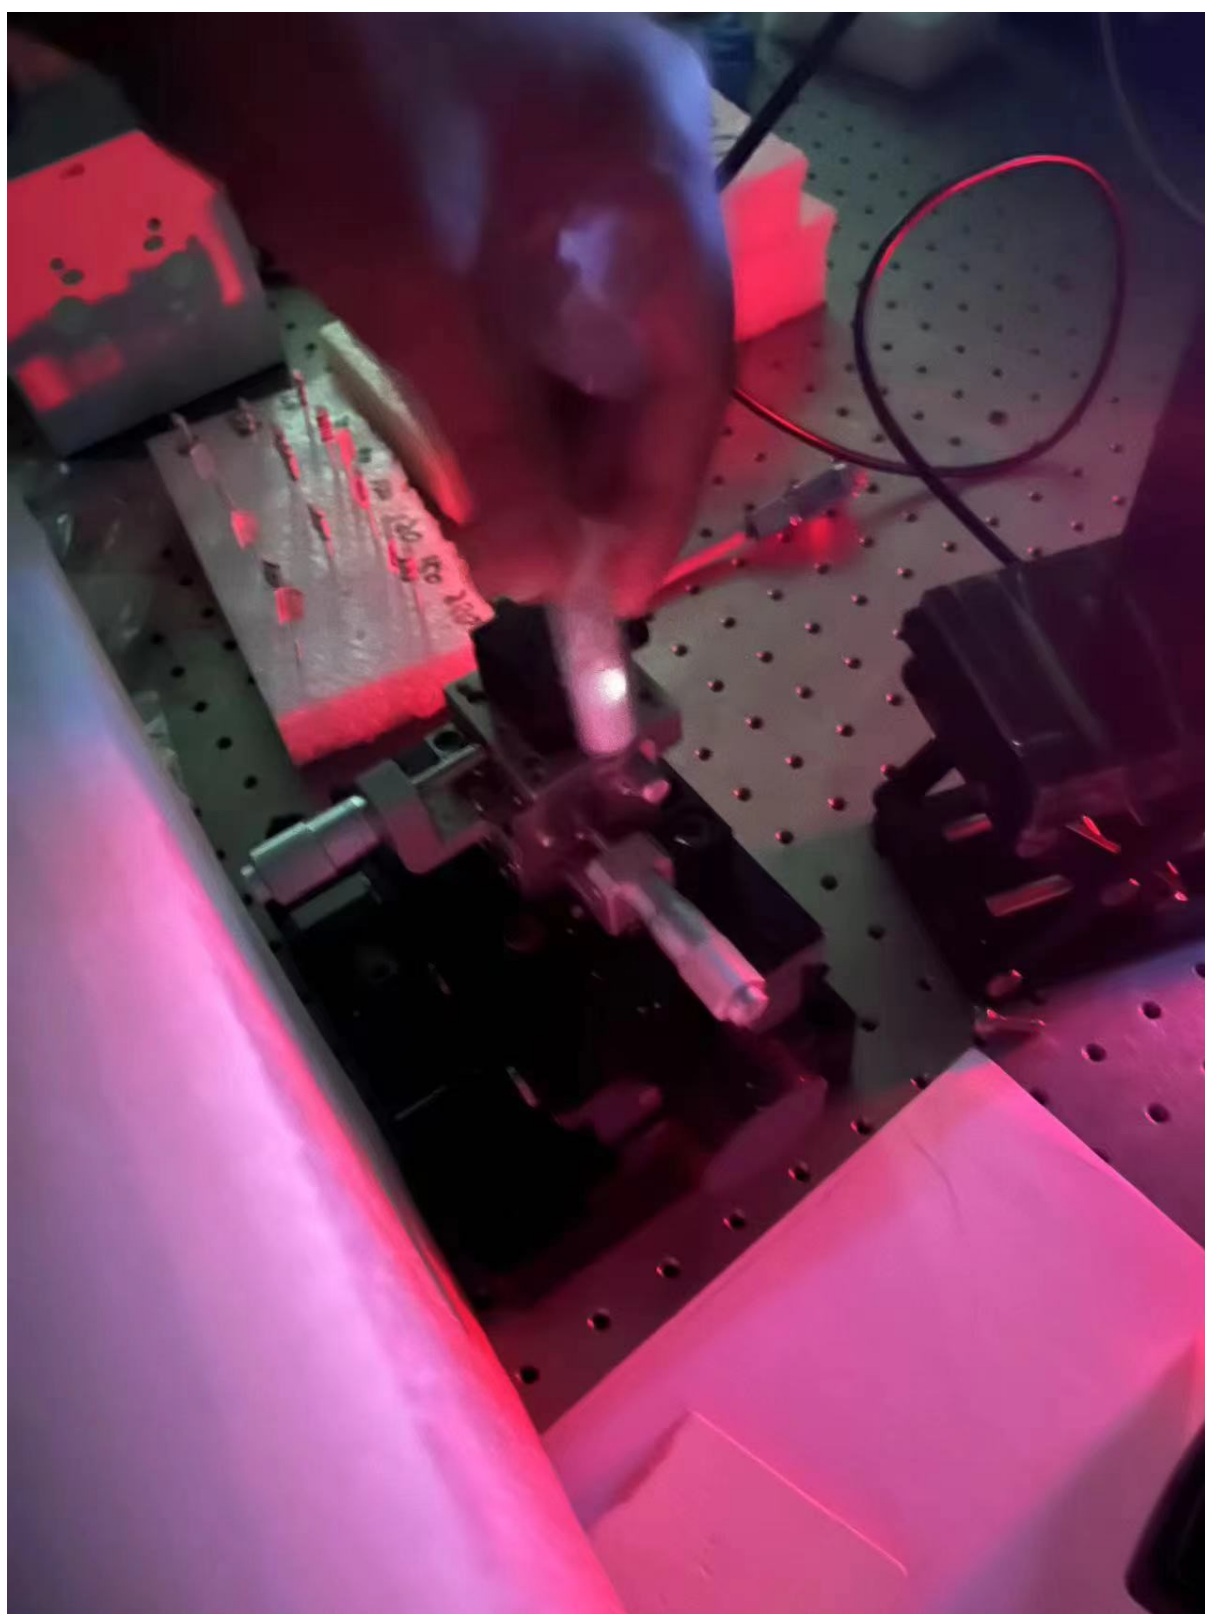

**Figure S7.** The SHG testing picture of  $\text{Na}_6\text{Si}_3\text{F}_{18}$  crystal.
